# Supplementary material for: Detecting hidden threats using longitudinal liquid biopsies
Source: Research Square preprint supplement (doi:10.21203/rs.3.rs-7395993/v1), 2025-09-08
Supplement: Supplementary file 1 [file 348b74b5f1e2aed900cb713c.pdf]

Supplementary Table 1:

Number of somatic regions (variants) called in each 2nd primary cancer (pink), and, for each corresponding patient, the number of these regions that were detected with at least 10 reads in each liquid biopsy sample (blue) and in the prostate cancer itself (green). The regions are classified by their location on the DNA as exonal vs non-exonal. The results from the PC tissue NGS are presented at the top of the list for each patient, even for those patients (#7 and #9) that had the PC tissue collection a few days after their first liquid biopsy.

| Pt#1                   | Number of regions with at least 10 reads | Number of exonal regions with at least 10 reads | Number of non-exonal regions with at least 10 reads | # of days sample was collected prior to 2nd primary diagnosis |
|------------------------|------------------------------------------|-------------------------------------------------|-----------------------------------------------------|---------------------------------------------------------------|
| PC tissue NGS          | 0                                        | 0                                               | 0                                                   | -3558                                                         |
| ctDNA NGS              | 1                                        | 0                                               | 1                                                   | -539                                                          |
| ctDNA NGS              | 7                                        | 0                                               | 7                                                   | -280                                                          |
| ctDNA NGS              | 0                                        | 0                                               | 0                                                   | -161                                                          |
| ctDNA NGS              | 5                                        | 0                                               | 5                                                   | -105                                                          |
| ctDNA NGS              | 9                                        | 0                                               | 9                                                   | -42                                                           |
| ctDNA NGS              | 1                                        | 0                                               | 1                                                   | -14                                                           |
| ctDNA NGS              | 4                                        | 0                                               | 4                                                   | 0                                                             |
| 2nd Primary tissue NGS | 78                                       | 7                                               | 71                                                  | 0                                                             |

| Pt#2                   | Number of regions with at least 10 reads | Number of exonal regions with at least 10 reads | Number of non-exonal regions with at least 10 reads | # of days sample was collected prior to 2nd primary diagnosis |
|------------------------|------------------------------------------|-------------------------------------------------|-----------------------------------------------------|---------------------------------------------------------------|
| PC tissue NGS          | 1                                        | 0                                               | 1                                                   | -1525                                                         |
| ctDNA NGS              | 4                                        | 2                                               | 2                                                   | -984                                                          |
| ctDNA NGS              | 7                                        | 3                                               | 4                                                   | -697                                                          |
| ctDNA NGS              | 7                                        | 2                                               | 5                                                   | -515                                                          |
| ctDNA NGS              | 3                                        | 1                                               | 2                                                   | -424                                                          |
| ctDNA NGS              | 4                                        | 1                                               | 3                                                   | -326                                                          |
| ctDNA NGS              | 5                                        | 2                                               | 3                                                   | -235                                                          |
| ctDNA NGS              | 2                                        | 0                                               | 2                                                   | -151                                                          |
| ctDNA NGS              | 6                                        | 2                                               | 4                                                   | -67                                                           |
| ctDNA NGS              | 16                                       | 4                                               | 12                                                  | -4                                                            |
| 2nd Primary tissue NGS | 104                                      | 13                                              | 91                                                  | 0                                                             |

| Pt#3                   | Number of regions with at least 10 reads | Number of exonal regions with at least 10 reads | Number of non-exonal regions with at least 10 reads | # of days sample was collected prior to 2nd primary diagnosis |
|------------------------|------------------------------------------|-------------------------------------------------|-----------------------------------------------------|---------------------------------------------------------------|
| PC tissue NGS          | 2                                        | 0                                               | 2                                                   | -2828                                                         |
| ctDNA NGS              | 9                                        | 3                                               | 6                                                   | -707                                                          |
| ctDNA NGS              | 8                                        | 2                                               | 6                                                   | -371                                                          |
| ctDNA NGS              | 17                                       | 6                                               | 11                                                  | -245                                                          |
| 2nd Primary tissue NGS | 3734                                     | 463                                             | 3271                                                | 0                                                             |

| Pt#4                   | Number of regions with at least 10 reads | Number of exonal regions with at least 10 reads | Number of non-exonal regions with at least 10 reads | # of days sample was collected prior to 2nd primary diagnosis |
|------------------------|------------------------------------------|-------------------------------------------------|-----------------------------------------------------|---------------------------------------------------------------|
| PC tissue NGS          | 0                                        | 0                                               | 0                                                   | -69                                                           |
| ctDNA NGS              | 3                                        | 0                                               | 3                                                   | -62                                                           |
| ctDNA NGS              | 2                                        | 0                                               | 2                                                   | -47                                                           |
| ctDNA NGS              | 2                                        | 0                                               | 2                                                   | -19                                                           |
| 2nd Primary tissue NGS | 35                                       | 1                                               | 34                                                  | 0                                                             |

| Pt#5          | Number of regions with at least 10 reads | Number of exonal regions with at least 10 reads | Number of non-exonal regions with at least 10 reads | # of days sample was collected prior to 2nd primary diagnosis |
|---------------|------------------------------------------|-------------------------------------------------|-----------------------------------------------------|---------------------------------------------------------------|
| PC tissue NGS | 0                                        | 0                                               | 0                                                   | -125                                                          |

|                        |    |   |    |      |
|------------------------|----|---|----|------|
| ctDNA NGS              | 1  | 0 | 1  | -111 |
| ctDNA NGS              | 1  | 0 | 1  | -83  |
| ctDNA NGS              | 1  | 0 | 1  | -55  |
| 2nd Primary tissue NGS | 41 | 3 | 38 | 0    |

| Pt#6                   | Number of regions with at least 10 reads | Number of exonal regions with at least 10 reads | Number of non-exonal regions with at least 10 reads | # of days sample was collected prior to 2nd primary diagnosis |
|------------------------|------------------------------------------|-------------------------------------------------|-----------------------------------------------------|---------------------------------------------------------------|
| PC tissue NGS          | 0                                        | 0                                               | 0                                                   | -1239                                                         |
| ctDNA NGS              | 4                                        | 0                                               | 4                                                   | -488                                                          |
| ctDNA NGS              | 7                                        | 1                                               | 6                                                   | -264                                                          |
| ctDNA NGS              | 7                                        | 0                                               | 7                                                   | -166                                                          |
| 2nd Primary tissue NGS | 67                                       | 8                                               | 59                                                  | 0                                                             |

| Pt#7                   | Number of regions with at least 10 reads | Number of exonal regions with at least 10 reads | Number of non-exonal regions with at least 10 reads | # of days sample was collected prior to 2nd primary diagnosis |
|------------------------|------------------------------------------|-------------------------------------------------|-----------------------------------------------------|---------------------------------------------------------------|
| PC tissue NGS          | 0                                        | 0                                               | 0                                                   | -231                                                          |
| ctDNA NGS              | 1                                        | 0                                               | 1                                                   | -241                                                          |
| ctDNA NGS              | 2                                        | 0                                               | 2                                                   | -116                                                          |
| ctDNA NGS              | 5                                        | 0                                               | 5                                                   | -60                                                           |
| ctDNA NGS              | 3                                        | 0                                               | 3                                                   | -4                                                            |
| 2nd Primary tissue NGS | 38                                       | 3                                               | 35                                                  | 0                                                             |

| Pt#8                   | Number of regions with at least 10 reads | Number of exonal regions with at least 10 reads | Number of non-exonal regions with at least 10 reads | # of days sample was collected prior to 2nd primary diagnosis |
|------------------------|------------------------------------------|-------------------------------------------------|-----------------------------------------------------|---------------------------------------------------------------|
| PC tissue NGS          | 0                                        | 0                                               | 0                                                   | -2393                                                         |
| ctDNA NGS              | 1                                        | 0                                               | 1                                                   | -433                                                          |
| ctDNA NGS              | 6                                        | 0                                               | 6                                                   | -188                                                          |
| ctDNA NGS              | 4                                        | 0                                               | 4                                                   | -97                                                           |
| ctDNA NGS              | 2                                        | 0                                               | 2                                                   | -62                                                           |
| 2nd Primary tissue NGS | 90                                       | 10                                              | 80                                                  | 0                                                             |

| Pt#9                   | Number of regions with at least 10 reads | Number of exonal regions with at least 10 reads | Number of non-exonal regions with at least 10 reads | # of days sample was collected prior to 2nd primary diagnosis |
|------------------------|------------------------------------------|-------------------------------------------------|-----------------------------------------------------|---------------------------------------------------------------|
| PC tissue NGS          | 1                                        | 0                                               | 1                                                   | -492                                                          |
| ctDNA NGS              | 8                                        | 0                                               | 8                                                   | -497                                                          |
| ctDNA NGS              | 10                                       | 0                                               | 10                                                  | -455                                                          |
| ctDNA NGS              | 6                                        | 0                                               | 6                                                   | -441                                                          |
| ctDNA NGS              | 8                                        | 0                                               | 8                                                   | -427                                                          |
| ctDNA NGS              | 10                                       | 0                                               | 10                                                  | -413                                                          |
| ctDNA NGS              | 5                                        | 0                                               | 5                                                   | -322                                                          |
| ctDNA NGS              | 5                                        | 0                                               | 5                                                   | -294                                                          |
| ctDNA NGS              | 6                                        | 0                                               | 6                                                   | -266                                                          |
| ctDNA NGS              | 7                                        | 0                                               | 7                                                   | -238                                                          |
| ctDNA NGS              | 5                                        | 0                                               | 5                                                   | -210                                                          |
| ctDNA NGS              | 5                                        | 0                                               | 5                                                   | -182                                                          |
| ctDNA NGS              | 3                                        | 0                                               | 3                                                   | -147                                                          |
| ctDNA NGS              | 8                                        | 0                                               | 8                                                   | -126                                                          |
| ctDNA NGS              | 13                                       | 0                                               | 13                                                  | -70                                                           |
| ctDNA NGS              | 10                                       | 0                                               | 10                                                  | -42                                                           |
| ctDNA NGS              | 16                                       | 0                                               | 16                                                  | -14                                                           |
| 2nd Primary tissue NGS | 70                                       | 2                                               | 68                                                  | 0                                                             |
